# Supplementary material for: Systems Approaches to Modeling Chronic Mucosal Inflammation
Source: Hindawi journal article supplement (doi:10.1155/2013/505864), 2013-01-01
Supplement: f1 [file 505864.f1.pdf]

**Table S1: Fold change of all genes for a given time-course in EMT and non-EMT states of cells.**

|          | - TGFβ |        |        |        |        |        | + TGFβ   |          |          |          |          |          |
|----------|--------|--------|--------|--------|--------|--------|----------|----------|----------|----------|----------|----------|
| TNFα→    | Ctl    | 1hr    | 3Hr    | 6Hr    | 12Hr   | 24Hr   | Ctl      | 1hr      | 3Hr      | 6Hr      | 12Hr     | 24Hr     |
| NFKBa    | 1.0    | 17.509 | 5.315  | 4.228  | 3.340  | 6.869  | 2.430    | 18.896   | 10.056   | 8.340    | 16.795   | 13.642   |
| GroB     | 1.0    | 12.817 | 3.972  | 2.789  | 2.888  | 2.028  | 5.054    | 116.162  | 32.447   | 22.471   | 38.586   | 30.910   |
| TNIP1    | 1.0    | 0.610  | 2.220  | 3.600  | 2.750  | 2.440  | 0.890    | 1.890    | 4.030    | 3.940    | 4.610    | 4.790    |
| IL-6     | 1.0    | 70.035 | 26.538 | 32.900 | 1.828  | 1.636  | 49.199   | 3420.520 | 1052.789 | 675.588  | 1833.011 | 2194.992 |
| IL-8     | 1.0    | 0.620  | 0.054  | 0.073  | 0.093  | 0.053  | 0.228    | 8.340    | 4.627    | 3.411    | 6.233    | 6.021    |
| TSLP     | 1.0    | 13.454 | 5.134  | 2.144  | 2.567  | 1.057  | 1.529    | 2.114    | 2.713    | 1.464    | 4.993    | 3.010    |
| TRAF1    | 1.0    | 1.275  | 1.347  | 1.329  | 1.636  | 3.784  | 1.707    | 6.543    | 7.413    | 8.398    | 21.407   | 14.123   |
| A20      | 1.0    | 51.625 | 22.162 | 18.507 | 6.148  | 14.621 | 1.818    | 142.025  | 30.910   | 29.857   | 62.250   | 38.854   |
| TRAF3    | 1.0    | 0.812  | 1.320  | 1.149  | 0.908  | 2.732  | 1.800    | 1.223    | 1.347    | 2.828    | 4.724    | 3.434    |
| INFB     | 1.0    | 4.377  | 0.758  | 0.540  | 3.411  | 1.505  | 4.676    | 5.464    | 3.580    | 1.376    | 10.411   | 5.816    |
| IL-25    | 1.0    | 0.006  | 0.057  | 0.042  | 0.012  | 1.853  | 1.326    | 0.334    | 5.098    | 0.702    | 1.110    | NA       |
| IL-33    | 1.0    | 0.191  | 1.905  | 1.189  | 0.841  | 1.028  | 0.052    | 0.072    | 0.206    | NA       | 0.096    | 0.003    |
| IFNa6    | 1.0    | 3.506  | 0.835  | 0.480  | 2.028  | 1.474  | 5.046    | 4.757    | 3.434    | 2.085    | 7.835    | 5.502    |
| IFNa21   | 1.0    | 4.993  | 0.543  | 0.547  | 2.809  | 1.815  | 5.587    | 5.169    | 4.000    | 1.537    | 10.411   | 5.242    |
| RANTES   | 1.0    | 0.330  | 1.526  | 1.729  | 12.817 | 2.173  | 0.097    | 0.384    | 0.801    | 1.087    | 2.071    | 0.807    |
| RIG-1    | 1.0    | 0.339  | 2.282  | 2.412  | 1.094  | 2.056  | 0.312    | 0.603    | 0.946    | 0.889    | 1.197    | 0.853    |
| LMP2     | 1.0    | 0.230  | 1.729  | 4.532  | 4.408  | 3.117  | 0.244    | 0.392    | 1.424    | 2.428    | 2.479    | 1.591    |
| TAP1     | 1.0    | 0.559  | 2.428  | 3.364  | 2.428  | 3.784  | 0.569    | 0.611    | 1.110    | 2.056    | 3.411    | 2.549    |
| STAT1    | 1.0    | 0.423  | 1.240  | 1.395  | 0.979  | 1.117  | 0.519    | 0.470    | 0.457    | 0.624    | 0.908    | 0.707    |
| STAT2    | 1.0    | 0.590  | 0.841  | 0.895  | 1.021  | 1.828  | 3.038    | 1.705    | 1.214    | 2.532    | 5.098    | 3.458    |
| IRF1     | 1.0    | 2.908  | 4.287  | 2.219  | 0.566  | 1.173  | 0.373    | 6.148    | 1.741    | 1.879    | 2.828    | 1.892    |
| IRF9     | 1.0    | 0.732  | 0.877  | 1.444  | 1.189  | 3.031  | 1.021    | 0.603    | 0.521    | 1.231    | 2.204    | 1.569    |
| SOCS3    | 1.0    | 4.112  | 1.214  | 1.042  | 1.310  | 1.189  | 3.046    | 2.969    | 1.729    | 1.474    | 5.579    | 3.918    |
| Fos      | 1.0    | 0.582  | 0.409  | 0.210  | 0.232  | 0.363  | 0.184    | 0.141    | 0.051    | 8.815    | 0.304    | 0.191    |
| c-Jun    | 1.0    | 2.657  | 0.693  | 0.901  | 1.424  | 1.879  | 7.543    | 5.352    | 4.056    | 4.925    | 10.778   | 8.112    |
| SOD2     | 1.0    | 12.553 | 0.310  | 0.503  | 25.813 | 17.388 | 12.401   | 0.966    | 24.590   | 2.990    | 19.027   | 1.682    |
| NOX1     | 1.0    | 2.282  | 1.404  | NA     | 7.945  | 0.255  | 1.537    | 2.479    | 1.959    | 2.908    | 8.056    | 13.737   |
| NOX4     | 1.0    | 0.323  | 38.055 | 0.140  | 0.595  | 0.470  | 4977.644 | 3565.775 | 2797.650 | 1360.574 | 3040.304 | 3516.684 |
| FSP1     | 1.0    | 0.196  | 0.829  | 0.339  | 0.451  | 0.518  | 0.375    | 0.525    | 0.354    | 0.529    | 0.382    | 0.406    |
| SMA      | 1.0    | 1.214  | 0.629  | 0.435  | 0.920  | 0.993  | 0.852    | 0.637    | 0.332    | 0.859    | 1.659    | 1.214    |
| Col1A    | 1.0    | NA     | NA     | 0.871  | 1.173  | 2.313  | 43.701   | NA       | 29.857   | 22.009   | 68.120   | 42.814   |
| Vimentin | 1.0    | 0.438  | 0.889  | 0.889  | 0.387  | 0.883  | 16.800   | 10.629   | 9.781    | 9.000    | 25.281   | 16.223   |
| Desmin   | 1.0    | 0.003  | 0.435  | 0.137  | 0.707  | 0.004  | 0.923    | 0.966    | 0.457    | 27.474   | NA       | 1.474    |
| MX1      | 1.0    | 0.193  | 1.840  | 3.784  | 1.986  | 2.908  | 0.076    | 0.056    | 0.047    | 0.206    | 0.423    | 0.199    |
| IFI27    | 1.0    | 28.443 | 1.141  | 1.301  | 48.168 | 37.271 | 31.722   | 25.281   | 29.243   | 1.905    | 40.224   | 35.753   |
| NFKB2    | 1.0    | 3.560  | 2.970  | 5.460  | 5.690  | 4.230  | 1.250    | 3.140    | 7.840    | 4.890    | 8.630    | 9.380    |
| CDKN1A1  | 1.0    | 0.090  | 1.000  | 0.680  | 3.810  | 3.160  | 3.810    | 3.390    | 4.590    | 3.320    | 5.860    | 5.810    |
| PCNA     | 1.0    | 0.480  | 0.710  | 1.460  | 0.760  | 0.920  | 2.280    | 1.910    | 1.820    | 1.440    | 1.670    | 1.640    |
| ITGA2    | 1.0    | 0.250  | 0.900  | 0.570  | 0.810  | 0.770  | 0.290    | 0.290    | 0.460    | 0.610    | 0.750    | 0.890    |
| SRT39    | 1.0    | 1.270  | 0.590  | 0.740  | 0.710  | 0.770  | 0.670    | 0.730    | 0.710    | 0.880    | 0.890    | 1.000    |
| TM4SF1   | 1.0    | 0.540  | 1.380  | 1.800  | 0.610  | 1.000  | 1.560    | 1.850    | 2.680    | 3.610    | 3.610    | 3.640    |
| ATM      | 1.0    | 0.390  | 0.590  | 0.660  | 0.540  | 0.690  | 2.210    | 2.060    | 1.420    | 1.450    | 1.930    | 1.850    |
| IL-28A   | 1.0    | 2.850  | 4.380  | 3.780  | 4.110  | 1.820  | 3.560    | 4.140    | 3.510    | 15.900   | 16.200   | 4.890    |
| IL-28B   | 1.0    | 2.390  | 4.350  | 3.110  | 2.160  | 0.860  | 1.760    | 2.310    | 1.240    | 7.940    | 9.250    | 2.690    |
| IL-29    | 1.0    | 2.990  | 5.780  | 4.720  | 1.850  | 1.070  | 3.010    | 4.350    | 2.010    | 7.160    | 4.630    | 2.970    |
| HOXB9    | 1.0    | 2.680  | 0.510  | 0.290  | 1.270  | 1.490  | 1.830    | 2.380    | 1.000    | 1.840    | 2.490    | 3.510    |
| SLUG     | 1.0    | 0.920  | 0.770  | 1.260  | 1.350  | 1.000  | 2.830    | 2.910    | 2.430    | 1.950    | 4.350    | 4.320    |
| SNAL1    | 1.0    | 1.790  | 2.930  | 3.210  | 1.450  | 0.730  | 25.400   | 12.600   | 9.600    | 11.200   | 29.200   | 23.800   |
| TWIST1   | 1.0    | 0.330  | 0.290  | 0.340  | 0.570  | 0.440  | 2.730    | 10.300   | 3.660    | 1.210    | 4.030    | 3.050    |
| TWIST2   | 1.0    | 0.120  | 0.490  | 0.520  | 0.250  | 0.190  | 2.810    | 1.930    | 4.790    | 2.790    | 2.780    | 2.810    |

Table S2: Z scores of all genes for a given time-course in EMT and non-EMT states of cells.

|          | - TGFβ |        |        |        |        |        | + TGFβ |        |        |        |        |        |
|----------|--------|--------|--------|--------|--------|--------|--------|--------|--------|--------|--------|--------|
| TNFα→    | Ctl    | 1hr    | 3Hr    | 6Hr    | 12Hr   | 24Hr   | Ctl    | 1hr    | 3Hr    | 6Hr    | 12Hr   | 24Hr   |
| NFKBα    | -1.336 | 1.409  | -0.618 | -0.799 | -0.947 | -0.360 | -1.098 | 1.639  | 0.170  | -0.116 | 1.290  | 0.766  |
| GroB     | -0.695 | -0.314 | -0.599 | -0.637 | -0.634 | -0.662 | -0.564 | 3.010  | 0.317  | -0.004 | 0.514  | 0.268  |
| TNIP1    | -1.234 | -1.512 | -0.364 | 0.620  | 0.014  | -0.207 | -1.312 | -0.599 | 0.926  | 0.862  | 1.340  | 1.468  |
| IL-6     | -0.717 | -0.654 | -0.694 | -0.688 | -0.717 | -0.717 | -0.673 | 2.432  | 0.251  | -0.096 | 0.970  | 1.303  |
| IL-8     | -0.540 | -0.672 | -0.867 | -0.861 | -0.854 | -0.868 | -0.807 | 1.998  | 0.714  | 0.293  | 1.269  | 1.196  |
| TSLP     | -0.740 | 3.049  | 0.518  | -0.392 | -0.263 | -0.722 | -0.579 | -0.401 | -0.219 | -0.599 | 0.475  | -0.128 |
| TRAF1    | -0.794 | -0.749 | -0.737 | -0.740 | -0.689 | -0.336 | -0.678 | 0.117  | 0.260  | 0.422  | 2.560  | 1.363  |
| A20      | -0.917 | 0.449  | -0.346 | -0.445 | -0.778 | -0.550 | -0.895 | 2.889  | -0.110 | -0.138 | 0.736  | 0.105  |
| TRAF3    | -0.801 | -0.961 | -0.529 | -0.674 | -0.880 | 0.675  | -0.119 | -0.611 | -0.505 | 0.757  | 2.373  | 1.274  |
| INFB     | -0.940 | 0.292  | -1.028 | -1.108 | -0.060 | -0.756 | 0.401  | 0.689  | 0.001  | -0.803 | 2.494  | 0.817  |
| IL-25    | -0.035 | -0.739 | -0.703 | -0.713 | -0.735 | 0.570  | 0.196  | -0.506 | 2.869  | -0.246 | 0.043  | NA     |
| IL-33    | 0.669  | -0.679 | 2.177  | 0.984  | 0.404  | 0.716  | -0.910 | -0.877 | -0.654 | NA     | -0.837 | -0.992 |
| IFNa6    | -1.001 | 0.158  | -1.077 | -1.241 | -0.526 | -0.782 | 0.869  | 0.736  | 0.124  | -0.499 | 2.158  | 1.080  |
| IFNa21   | -0.958 | 0.492  | -1.123 | -1.122 | -0.301 | -0.662 | 0.707  | 0.556  | 0.131  | -0.763 | 2.459  | 0.582  |
| RANTES   | -0.323 | -0.526 | -0.164 | -0.103 | 3.253  | 0.032  | -0.597 | -0.510 | -0.384 | -0.297 | 0.001  | -0.382 |
| RIG-1    | -0.242 | -1.212 | 1.638  | 1.828  | -0.104 | 1.307  | -1.252 | -0.825 | -0.322 | -0.405 | 0.047  | -0.459 |
| LMP2     | -0.679 | -1.221 | -0.166 | 1.807  | 1.720  | 0.811  | -1.211 | -1.107 | -0.380 | 0.326  | 0.362  | -0.263 |
| TAP1     | -0.869 | -1.257 | 0.386  | 1.207  | 0.386  | 1.577  | -1.248 | -1.210 | -0.773 | 0.059  | 1.249  | 0.492  |
| STAT1    | 0.566  | -1.247 | 1.320  | 1.807  | 0.502  | 0.935  | -0.947 | -1.101 | -1.141 | -0.615 | 0.276  | -0.355 |
| STAT2    | -0.719 | -1.034 | -0.842 | -0.800 | -0.703 | -0.083 | 0.849  | -0.177 | -0.555 | 0.459  | 2.433  | 1.172  |
| IRF1     | -0.795 | 0.417  | 1.294  | -0.020 | -1.071 | -0.685 | -1.194 | 2.476  | -0.324 | -0.236 | 0.367  | -0.228 |
| IRF9     | -0.414 | -0.804 | -0.594 | 0.231  | -0.140 | 2.537  | -0.383 | -0.991 | -1.110 | -0.079 | 1.335  | 0.413  |
| SOCS3    | -0.953 | 1.193  | -0.805 | -0.923 | -0.739 | -0.822 | 0.458  | 0.405  | -0.450 | -0.626 | 2.204  | 1.059  |
| Fos      | -0.017 | -0.194 | -0.268 | -0.352 | -0.343 | -0.287 | -0.363 | -0.382 | -0.420 | 3.299  | -0.313 | -0.360 |
| c-Jun    | -0.982 | -0.459 | -1.079 | -1.013 | -0.848 | -0.704 | 1.084  | 0.392  | -0.017 | 0.257  | 2.105  | 1.263  |
| SOD2     | -0.943 | 0.276  | -1.016 | -0.996 | 1.677  | 0.787  | 0.260  | -0.947 | 1.547  | -0.733 | 0.960  | -0.872 |
| NOX1     | -0.746 | -0.423 | -0.644 | NA     | 1.004  | -0.934 | -0.611 | -0.373 | -0.504 | -0.265 | 1.032  | 2.464  |
| NOX4     | -0.906 | -0.907 | -0.885 | -0.907 | -0.907 | -0.907 | 1.900  | 1.104  | 0.671  | -0.140 | 0.807  | 1.076  |
| FSP1     | 2.395  | -1.394 | 1.591  | -0.720 | -0.194 | 0.122  | -0.552 | 0.156  | -0.652 | 0.173  | -0.520 | -0.404 |
| SMA      | 0.298  | 0.909  | -0.761 | -1.312 | 0.071  | 0.279  | -0.122 | -0.736 | -1.605 | -0.105 | 2.176  | 0.909  |
| Col1A    | -0.978 | NA     | NA     | -0.984 | -0.970 | -0.921 | 0.875  | NA     | 0.274  | -0.066 | 1.934  | 0.836  |
| Vimentin | -0.835 | -0.905 | -0.848 | -0.848 | -0.911 | -0.849 | 1.138  | 0.368  | 0.262  | 0.164  | 2.198  | 1.066  |
| Desmin   | -0.265 | -0.394 | -0.338 | -0.377 | -0.303 | -0.394 | -0.275 | -0.270 | -0.336 | 3.157  | NA     | -0.204 |
| MX1      | -0.049 | -0.709 | 0.638  | 2.228  | 0.758  | 1.512  | -0.805 | -0.821 | -0.829 | -0.699 | -0.521 | -0.704 |
| IFI27    | -1.350 | 0.300  | -1.341 | -1.332 | 1.485  | 0.831  | 0.497  | 0.110  | 0.348  | -1.295 | 1.008  | 0.739  |
| NFKB2    | -1.476 | -0.491 | -0.718 | 0.240  | 0.328  | -0.233 | -1.380 | -0.653 | 1.155  | 0.021  | 1.459  | 1.747  |
| CDKN1A1  | -1.092 | -1.578 | -1.092 | -1.263 | 0.410  | 0.062  | 0.410  | 0.185  | 0.826  | 0.148  | 1.505  | 1.478  |
| PCNA     | -0.638 | -1.611 | -1.180 | 0.223  | -1.087 | -0.787 | 1.757  | 1.065  | 0.897  | 0.186  | 0.616  | 0.560  |
| ITGA2    | 1.468  | -1.528 | 1.068  | -0.250 | 0.709  | 0.549  | -1.368 | -1.368 | -0.689 | -0.090 | 0.469  | 1.028  |
| SRT39    | 0.942  | 2.437  | -1.329 | -0.498 | -0.665 | -0.332 | -0.886 | -0.554 | -0.665 | 0.277  | 0.332  | 0.942  |
| TM4SF1   | -0.841 | -1.252 | -0.501 | -0.125 | -1.190 | -0.841 | -0.340 | -0.081 | 0.662  | 1.494  | 1.494  | 1.521  |
| ATM      | -0.365 | -1.323 | -1.009 | -0.899 | -1.087 | -0.852 | 1.535  | 1.299  | 0.294  | 0.341  | 1.095  | 0.969  |
| IL-28A   | -0.935 | -0.551 | -0.234 | -0.359 | -0.290 | -0.765 | -0.404 | -0.284 | -0.415 | 2.152  | 2.214  | -0.129 |
| IL-28B   | -0.877 | -0.336 | 0.426  | -0.056 | -0.426 | -0.931 | -0.581 | -0.367 | -0.783 | 1.822  | 2.331  | -0.220 |
| IL-29    | -1.349 | -0.259 | 1.271  | 0.690  | -0.883 | -1.311 | -0.248 | 0.487  | -0.796 | 2.027  | 0.640  | -0.269 |
| HOXB9    | -0.758 | 1.085  | -1.295 | -1.537 | -0.462 | -0.220 | 0.153  | 0.756  | -0.758 | 0.164  | 0.877  | 1.996  |
| SLUG     | -0.887 | -0.952 | -1.074 | -0.675 | -0.602 | -0.887 | 0.601  | 0.666  | 0.276  | -0.114 | 1.836  | 1.812  |
| SNAL1    | -0.921 | -0.843 | -0.729 | -0.701 | -0.877 | -0.948 | 1.511  | 0.235  | -0.064 | 0.095  | 1.890  | 1.352  |
| TWIST1   | -0.484 | -0.727 | -0.742 | -0.724 | -0.640 | -0.687 | 0.146  | 2.900  | 0.484  | -0.407 | 0.619  | 0.262  |
| TWIST2   | -0.493 | -1.107 | -0.849 | -0.828 | -1.016 | -1.058 | 0.770  | 0.156  | 2.152  | 0.756  | 0.749  | 0.770  |
